# Supplementary material for: Ultrasound-assisted magnetic dispersive micro-solid-phase extraction based on carbon quantum dots/zeolite imidazolate framework-90/polyvinyl pyrrolidone/Fe3O4 followed by high-performance liquid chromatography with ultraviolet detection for trace analysis of paracetamol and etodolac in human plasma
Source: Royal Society of Chemistry journal article supplement (doi:10.1039/d4ra04875j), 2024-01-01
Supplement: d4ra04875j1.pdf [file d4ra04875j1.pdf]

## Supporting information

### **Ultrasound-assisted magnetic dispersive micro-solid phase extraction based on carbon quantum dots/zeolite imidazolate framework-90/polyvinyl pyrrolidone combined with high performance liquid chromatography with ultraviolet detection for trace analysis of paracetamol and etodolac in human plasma**

Kimia Ahmadi<sup>1</sup>, Aysan Abolfathi<sup>1</sup>, Sana Nasirimoghadam<sup>1</sup>, Negar Nasiri Moghaddam Kalkhoran<sup>1</sup>, Mohsen Zeeb<sup>\*,1</sup>

<sup>1</sup> *Department of Applied Chemistry, Faculty of Science, South Tehran Branch, Islamic Azad University, Tehran, Iran*

---

\* Corresponding author, e-mail address: [zeeb.mohsen@gmail.com](mailto:zeeb.mohsen@gmail.com) and Tel.: + 98 21

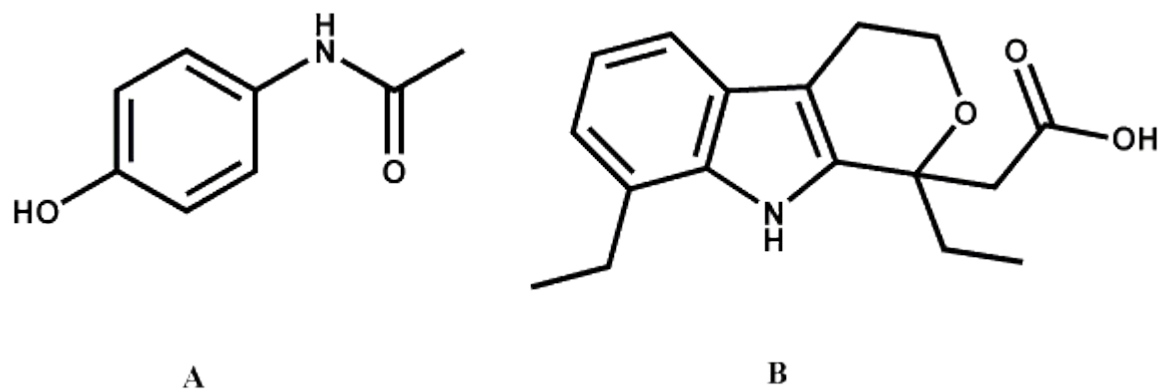

**Fig 1S.** Chemical structures of drugs: (A) PCM (Chemical Formula:  $C_8H_9NO_2$ , MW:151.16 g/mol), (B) EDL (Chemical Formula:  $C_{17}H_{21}NO_3$ , MW: 287.37 g/mol)
